# Supplementary material for: Baseline Gut Metagenomic Functional Gene Signature Associated with Variable Weight Loss Responses following a Healthy Lifestyle Intervention in Humans
Source: PubMed Central journal article supplement (PMC8547453; doi:10.1128/msystems.00964-21), 2021-09-14
Supplement: msystems.00964-21-sf002.pdf [file msystems.00964-21-sf002.pdf]

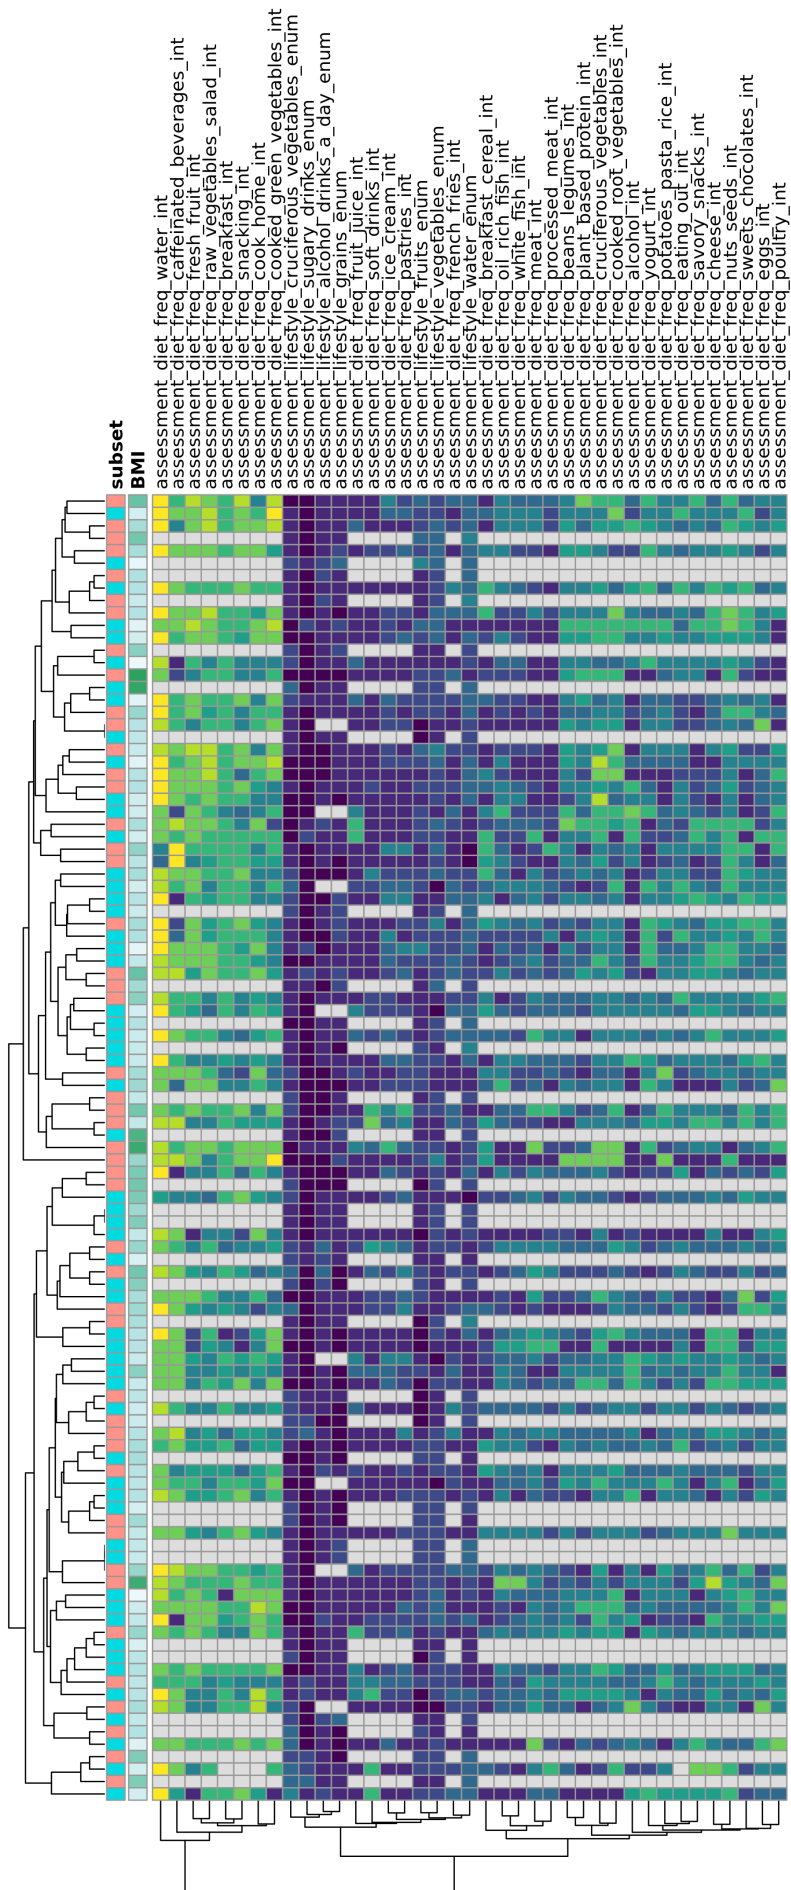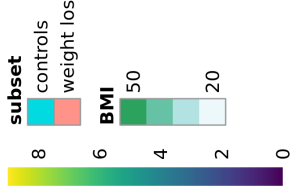

assessment\_diet\_freq\_water\_int  
 assessment\_diet\_freq\_caffeinated\_beverages\_int  
 assessment\_diet\_freq\_fresh\_fruit\_int  
 assessment\_diet\_freq\_raw\_vegetables\_salad\_int  
 assessment\_diet\_freq\_breakfast\_int  
 assessment\_diet\_freq\_snacking\_int  
 assessment\_diet\_freq\_cook\_home\_int  
 assessment\_diet\_freq\_cooked\_green\_vegetables\_int  
 assessment\_lifestyle\_cruciferous\_vegetables\_enum  
 assessment\_lifestyle\_sugary\_drinks\_enum  
 assessment\_lifestyle\_alcohol\_drinks\_a\_day\_enum  
 assessment\_lifestyle\_grains\_enum  
 assessment\_diet\_freq\_fruit\_juice\_int  
 assessment\_diet\_freq\_soft\_drinks\_int  
 assessment\_diet\_freq\_ice\_cream\_int  
 assessment\_diet\_freq\_pastries\_int  
 assessment\_lifestyle\_fruits\_enum  
 assessment\_lifestyle\_vegetables\_enum  
 assessment\_diet\_freq\_french\_fries\_int  
 assessment\_lifestyle\_water\_enum  
 assessment\_diet\_freq\_breakfast\_cereal\_int  
 assessment\_diet\_freq\_oil\_rich\_fish\_int  
 assessment\_diet\_freq\_white\_fish\_int  
 assessment\_diet\_freq\_meat\_int  
 assessment\_diet\_freq\_processed\_meat\_int  
 assessment\_diet\_freq\_beans\_legumes\_int  
 assessment\_diet\_freq\_plant\_based\_protein\_int  
 assessment\_diet\_freq\_cruciferous\_vegetables\_int  
 assessment\_diet\_freq\_cooked\_root\_vegetables\_int  
 assessment\_diet\_freq\_alcohol\_int  
 assessment\_diet\_freq\_yogurt\_int  
 assessment\_diet\_freq\_potatoes\_pasta\_rice\_int  
 assessment\_diet\_freq\_eating\_out\_int  
 assessment\_diet\_freq\_savory\_snacks\_int  
 assessment\_diet\_freq\_cheese\_int  
 assessment\_diet\_freq\_nuts\_seeds\_int  
 assessment\_diet\_freq\_sweets\_chocolates\_int  
 assessment\_diet\_freq\_eggs\_int  
 assessment\_diet\_freq\_poultry\_int
