# Supplementary material for: Baseline Gut Metagenomic Functional Gene Signature Associated with Variable Weight Loss Responses following a Healthy Lifestyle Intervention in Humans
Source: PubMed Central journal article supplement (PMC8547453; doi:10.1128/msystems.00964-21), 2021-09-14

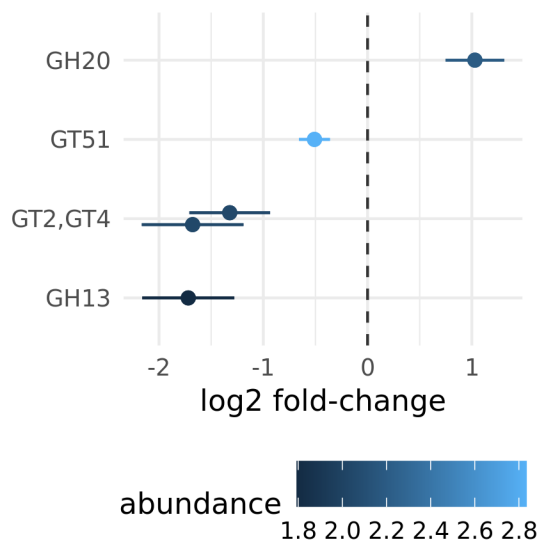

Supplement: msystems.00964-21-sf003.pdf [file msystems.00964-21-sf003.pdf]
